# Supplementary material for: Structural basis for oligoclonal T cell recognition of a shared p53 cancer neoantigen
Source: PubMed Central journal article supplement (PMC7283474; doi:10.1038/s41467-020-16755-y), 2020-06-09
Supplement: 41467_2020_16755_MOESM1_ESM.pdf [file 41467_2020_16755_MOESM1_ESM.pdf]

## **Supplementary Information**

### **Structural basis for oligoclonal T cell response to a shared p53 cancer neoantigen**

Daichao Wu et al.

#### **Supplementary Tables 1–9**

#### **Supplementary Figures 1–3**

**Supplementary Table 1. Data collection and structure refinement statistics**

|                                             | <b>p53R175H–HLA-A2</b>                     | <b>p53–HLA-A2</b>                          |
|---------------------------------------------|--------------------------------------------|--------------------------------------------|
| PDB accession code                          | 6VR5                                       | 6VR1                                       |
| <b>Data collection</b>                      |                                            |                                            |
| Resolution range (Å) <sup>a</sup>           | 48.1–2.38 (2.47–2.38)                      | 39.8–2.37 (2.46–2.37)                      |
| Space group                                 | <i>P12<sub>1</sub>1</i>                    | <i>P12<sub>1</sub>1</i>                    |
| Unit cell parameters                        | 71.6 Å, 79.7 Å, 85.9 Å<br>90°, 102.1°, 90° | 71.3 Å, 79.7 Å, 85.8 Å<br>90°, 101.7°, 90° |
| Total reflections <sup>a</sup>              | 186,546 (18,604)                           | 184,901 (17,529)                           |
| Unique reflections <sup>a</sup>             | 37,930 (3,742)                             | 38,306 (3,796)                             |
| Multiplicity <sup>a</sup>                   | 4.9 (5.0)                                  | 4.8 (4.6)                                  |
| Completeness (%) <sup>a</sup>               | 99.8 (99.9)                                | 99.6 (99.5)                                |
| Mean <i>I</i> /σ( <i>I</i> ) <sup>a</sup>   | 13.7 (2.9)                                 | 12.0 (2.2)                                 |
| Wilson <i>B</i> factor (Å <sup>2</sup> )    | 32.6                                       | 37.4                                       |
| <i>R</i> <sub>merge</sub> <sup>a,b</sup>    | 0.108 (0.415)                              | 0.109 (0.566)                              |
| <i>CC</i> <sub>1/2</sub> <sup>a</sup>       | 0.994 (0.900)                              | 0.995 (0.849)                              |
| <b>Refinement</b>                           |                                            |                                            |
| Resolution range (Å)                        | 20.0–2.38                                  | 20.0–2.37                                  |
| Reflections used in refinement <sup>a</sup> | 37,921 (3,743)                             | 38,288 (3,797)                             |
| <i>R</i> <sub>work</sub> <sup>a,c</sup>     | 0.229 (0.290)                              | 0.217 (0.290)                              |
| <i>R</i> <sub>free</sub> <sup>a,c</sup>     | 0.280 (0.328)                              | 0.274 (0.332)                              |
| No. of protein atoms                        | 6,149                                      | 6,164                                      |
| No. of waters                               | 243                                        | 350                                        |
| Protein residues                            | 765                                        | 768                                        |
| r.m.s.d. from ideality                      |                                            |                                            |
| Bond lengths (Å)                            | 0.012                                      | 0.013                                      |
| Bond angles (°)                             | 1.94                                       | 2.07                                       |
| Ramachandran plot statistics                |                                            |                                            |
| Favored (%)                                 | 98.0                                       | 96.4                                       |
| Allowed (%)                                 | 1.9                                        | 3.3                                        |
| Disallowed (%)                              | 0.1                                        | 0.3                                        |
| Rotamer outliers (%)                        | 2.4                                        | 3.7                                        |
| Clashscore                                  | 7.3                                        | 9.4                                        |
| Average <i>B</i> factor (Å <sup>2</sup> )   | 33.0                                       | 41.0                                       |
| Protein                                     | 33.0                                       | 40.8                                       |
| Waters                                      | 35.3                                       | 48.5                                       |

<sup>a</sup>Values in parentheses correspond to the highest resolution shell.

<sup>b</sup> $R_{\text{merge}} = \sum |I_j - \langle I \rangle| / \sum I_j$ , where  $I_j$  is the intensity of an individual reflection and  $\langle I \rangle$  is the average intensity of that reflection.

<sup>c</sup> $R_{\text{work}} (R_{\text{free}}) = \sum ||F_o| - |F_c|| / \sum |F_o|$ ; 5.0% of data were used for  $R_{\text{free}}$ .

**Supplementary Table 2. Data collection and refinement statistics**

|                                             | <b>TCR 12-6–<br/>p53R175H–HLA-A2</b>            | <b>TCR 38-10–<br/>p53R175H–HLA-A2</b>       | <b>TCR 1a2–<br/>p53R175H–HLA-A2</b>            |
|---------------------------------------------|-------------------------------------------------|---------------------------------------------|------------------------------------------------|
| PDB accession code                          | 6VRM                                            | 6VRN                                        | 6QVO                                           |
| <b>Data collection</b>                      |                                                 |                                             |                                                |
| Resolution range (Å)                        | 37.9–2.61 (2.70–2.61)                           | 42.9–2.46 (2.55–2.46)                       | 48.5–3.00 (3.11–3.00)                          |
| Space group                                 | <i>C</i> 121                                    | <i>P</i> 212121                             | <i>P</i> 31                                    |
| Unit cell parameters                        | 89.4 Å, 120.6 Å,<br>119.7 Å<br>90°, 108.4°, 90° | 44.2 Å, 87.4 Å, 245.9<br>Å<br>90°, 90°, 90° | 118.1 Å, 118.1 Å,<br>153.1 Å<br>90°, 90°, 120° |
| Total reflections <sup>a</sup>              | 94,817 (9,927)                                  | 179,362 (17,356)                            | 122,552 (12,329)                               |
| Unique reflections <sup>a</sup>             | 36,118 (3,613)                                  | 34,706 (3,222)                              | 47,558 (4,418)                                 |
| Multiplicity <sup>a</sup>                   | 2.6 (2.7)                                       | 5.2 (5.2)                                   | 2.6 (2.6)                                      |
| Completeness (%) <sup>a</sup>               | 98.1 (99.0)                                     | 96.6 (93.7)                                 | 97.2 (92.8)                                    |
| Mean $I/\sigma(I)$ <sup>a</sup>             | 12.1 (1.9)                                      | 7.8 (2.5)                                   | 7.4 (2.3)                                      |
| Wilson <i>B</i> factor (Å <sup>2</sup> )    | 64.5                                            | 36.5                                        | 56.4                                           |
| $R_{\text{merge}}$ <sup>a,b</sup>           | 0.044 (0.343)                                   | 0.145 (0.604)                               | 0.110 (0.477)                                  |
| $CC_{1/2}$ <sup>a</sup>                     | 0.998 (0.945)                                   | 0.989 (0.806)                               | 0.844 (0.538)                                  |
| <b>Refinement</b>                           |                                                 |                                             | <sup>d</sup> see below                         |
| Resolution range (Å)                        | 19.8–2.61                                       | 20.0–2.46                                   | 48.5–3.00                                      |
| Reflections used in refinement <sup>a</sup> | 36,009 (3,613)                                  | 34,529 (3,222)                              | 47,254 (4,421)                                 |
| $R_{\text{work}}$ <sup>c</sup>              | 0.191 (0.389)                                   | 0.194 (0.270)                               | 0.162 (0.327)                                  |
| $R_{\text{free}}$ <sup>c</sup>              | 0.275 (0.407)                                   | 0.259 (0.343)                               | 0.211 (0.366)                                  |
| No. of protein atoms                        | 6,282                                           | 6,465                                       | 12,740                                         |
| No. of waters                               | 21                                              | 294                                         |                                                |
| Protein residues                            | 809                                             | 813                                         | 1,614                                          |
| r.m.s.d. from ideality                      |                                                 |                                             |                                                |
| Bond lengths (Å)                            | 0.011                                           | 0.011                                       | 0.008                                          |
| Bond angles (°)                             | 1.88                                            | 1.77                                        | 1.71                                           |
| Ramachandran plot statistics                |                                                 |                                             |                                                |
| Favored (%)                                 | 90.7                                            | 96.1                                        | 90.8                                           |
| Allowed (%)                                 | 8.5                                             | 3.6                                         | 8.2                                            |
| Disallowed (%)                              | 0.8                                             | 0.3                                         | 1.0                                            |
| Rotamer outliers (%)                        | 8.2                                             | 4.5                                         | 9.3                                            |
| Clashscore                                  | 13.0                                            | 5.8                                         | 13.6                                           |
| Average <i>B</i> factor (Å <sup>2</sup> )   | 78.0                                            | 39.0                                        | 54.0                                           |
| Protein                                     | 78.0                                            | 40.0                                        | 54.0                                           |
| Waters                                      | 81.5                                            | 38.9                                        |                                                |

<sup>a</sup>Values in parentheses correspond to the highest resolution shell.

<sup>b</sup> $R_{\text{merge}} = \sum |I_j - \langle I \rangle| / \sum I_j$ , where  $I_j$  is the intensity of an individual reflection and  $\langle I \rangle$  is the average intensity of that reflection.

<sup>c</sup> $R_{\text{work}} (R_{\text{free}}) = \sum ||F_o| - |F_c|| / \sum |F_o|$ ; 5.0% of data were used for  $R_{\text{free}}$ .

<sup>d</sup>This structure was twinned and refined with two domains, where the minor domain, with twin law (K, H, L), has twin factor 0.39.

**Supplementary Table 3. Data collection and refinement statistics**

|                                             | <b>TCR 12-6</b>                           | <b>TCR 1a2</b>                            |
|---------------------------------------------|-------------------------------------------|-------------------------------------------|
| PDB accession code                          | 6VTH                                      | 6VTC                                      |
| <b>Data collection</b>                      |                                           |                                           |
| Resolution range (Å) <sup>a</sup>           | 42.5–2.36 (2.44–2.36)                     | 35.4–1.83 (1.90–1.83)                     |
| Space group                                 | <i>P</i> 1211                             | <i>P</i> 22121                            |
| Unit cell parameters                        | 65.6 Å, 85.0 Å, 88.7 Å<br>90°, 93.6°, 90° | 41.1 Å, 106.4 Å, 112.7 Å<br>90°, 90°, 90° |
| Total reflections <sup>a</sup>              | 99,994 (10,557)                           | 340,502 (33,949)                          |
| Unique reflections <sup>a</sup>             | 36,570 (3,696)                            | 44,449 (4,388)                            |
| Multiplicity                                | 2.7 (2.8)                                 | 7.7 (7.7)                                 |
| Completeness (%) <sup>a</sup>               | 91.1 (92.6)                               | 99.7 (99.8)                               |
| Mean <i>I</i> /σ( <i>I</i> )                | 13.8 (3.9)                                | 30.6 (4.7)                                |
| Wilson <i>B</i> factor (Å <sup>2</sup> )    | 35.2                                      | 34.6                                      |
| <i>R</i> <sub>merge</sub> <sup>a,b</sup>    | 0.096 (0.263)                             | 0.081 (0.328)                             |
| <i>CC</i> <sub>1/2</sub> <sup>a</sup>       | 0.978 (0.828)                             | 0.996 (0.973)                             |
| <b>Refinement</b>                           |                                           |                                           |
| Resolution range (Å)                        | 20.0–2.36                                 | 20.0–1.83                                 |
| Reflections used in refinement <sup>a</sup> | 36,570 (3,696)                            | 44,437 (4,388)                            |
| <i>R</i> <sub>work</sub> <sup>a,c</sup>     | 0.212 (0.208)                             | 0.190 (0.265)                             |
| <i>R</i> <sub>free</sub> <sup>a,c</sup>     | 0.264 (0.256)                             | 0.231 (0.314)                             |
| No. of protein atoms                        | 6,694                                     | 3,433                                     |
| No. of waters                               | 347                                       | 391                                       |
| Protein residues                            | 867                                       | 440                                       |
| r.m.s.d. from ideality                      |                                           |                                           |
| Bond lengths (Å)                            | 0.008                                     | 0.015                                     |
| Bond angles (°)                             | 1.51                                      | 2.23                                      |
| Ramachandran plot statistics                |                                           |                                           |
| Favored (%)                                 | 97.5                                      | 96.8                                      |
| Allowed (%)                                 | 2.5                                       | 2.8                                       |
| Disallowed (%)                              | 0.0                                       | 0.4                                       |
| Rotamer outliers (%)                        | 2.8                                       | 3.71                                      |
| Clashscore                                  | 9.4                                       | 11.1                                      |
| Average <i>B</i> factor (Å <sup>2</sup> )   | 40.0                                      | 43.0                                      |
| Protein                                     | 40.0                                      | 42.2                                      |
| Waters                                      | 44.9                                      | 52.7                                      |

<sup>a</sup>Values in parentheses correspond to the highest resolution shell.

<sup>b</sup> $R_{\text{merge}} = \sum |I_j - \langle I \rangle| / \sum I_j$ , where  $I_j$  is the intensity of an individual reflection and  $\langle I \rangle$  is the average intensity of that reflection.

<sup>c</sup> $R_{\text{work}} (R_{\text{free}}) = \sum ||F_o| - |F_c|| / \sum |F_o|$ ; 5.0% of data were used for  $R_{\text{free}}$ .

**Supplementary Table 4. TCR center positions over peptide-MHC plane for MHC class I complexes**

| Complex <sup>1</sup> | x pos <sup>2</sup> | y pos <sup>2</sup> |
|----------------------|--------------------|--------------------|
| 5SWS                 | 22.3               | -14.8              |
| 5SWZ                 | 22.3               | -13.9              |
| <b>38-10</b>         | <b>14.8</b>        | <b>-6.1</b>        |
| 3TJH                 | 13.8               | -3.3               |
| 5TEZ                 | 13                 | -0.8               |
| 3TF7                 | 12.9               | 3                  |
| 3PQY                 | 12.5               | 1.6                |
| 4G9F                 | 12.5               | -4.8               |
| 3TFK                 | 12.4               | 2.5                |
| 4G8G                 | 12.2               | -4.6               |
| 3KPR                 | 11.8               | -1.4               |
| 3KPS                 | 11.8               | -1.3               |
| 4N0C                 | 11.3               | 1.6                |
| 4N5E                 | 11.3               | 1.8                |
| 5IVX                 | 10.9               | 1.6                |
| 1MI5                 | 10.6               | -2.8               |
| 2OL3                 | 10.6               | 0.1                |
| 5W1W                 | 10.4               | -0.5               |
| 4MXQ                 | 10.3               | 2.9                |
| 1NAM                 | 10                 | -1.8               |
| 5W1V                 | 10                 | -0.6               |
| <b>12-6</b>          | <b>10.0</b>        | <b>-2.3</b>        |
| 1FO0                 | 9.6                | -0.4               |
| 5D2L                 | 8.8                | -1.7               |
| 3TPU                 | 8.1                | 0.1                |
| <b>1a2</b>           | <b>8.1</b>         | <b>-0.3</b>        |
| 4MS8                 | 8                  | 1.8                |
| 3GSN                 | 7.6                | -3.2               |
| 2OI9                 | 7.4                | 2.2                |
| 5M01                 | 7.4                | -2.2               |
| 6G9Q                 | 7.4                | -2.2               |
| 5M00                 | 7.2                | -1.8               |
| 5D2N                 | 7.1                | -2.5               |
| 5HHO                 | 7.1                | 4.9                |
| 3E3Q                 | 7                  | 2                  |
| 5EUO                 | 7                  | 4.6                |
| 3E2H                 | 6.9                | 1.8                |
| 2E7L                 | 6.8                | 1.9                |

|      |     |      |
|------|-----|------|
| 4MVB | 6.8 | 1.2  |
| 5M02 | 6.8 | -2.1 |
| 5TIL | 6.6 | -2.1 |
| 2VLR | 6.5 | 4.5  |
| 5HHM | 6.5 | 4.7  |
| 5E6I | 6.4 | 6.5  |
| 5TJE | 6.4 | -2.2 |
| 2ESV | 6.3 | 2.4  |
| 3SJV | 6.2 | -2.5 |
| 1G6R | 6   | 1.2  |
| 1MWA | 5.9 | 1.5  |
| 2BNQ | 5.9 | -1.9 |
| 1OGA | 5.8 | 4    |
| 2PYE | 5.8 | -3.6 |
| 4EUP | 5.8 | 1.3  |
| 5EU6 | 5.8 | 1.1  |
| 6MTM | 5.8 | 1    |
| 2BNR | 5.7 | -2.1 |
| 2P5E | 5.7 | -3.5 |
| 2P5W | 5.6 | -3.5 |
| 5YXU | 5.6 | -2.7 |
| 2YPL | 5.5 | 1.2  |
| 4MJI | 5.4 | 1.9  |
| 5WLG | 5.3 | 1.5  |
| 5JZI | 5.2 | -1.7 |
| 2F53 | 5   | -3   |
| 3QDM | 4.9 | -2.3 |
| 5E9D | 4.8 | 5.3  |
| 5ISZ | 4.6 | 3.9  |
| 5JHD | 4.5 | 4.9  |
| 6BJ2 | 4.4 | 5.6  |
| 5MEN | 4.1 | 5.1  |
| 1LP9 | 4   | 2.7  |
| 4NHU | 4   | -5.7 |
| 4MNQ | 3.9 | 5.2  |
| 3DXA | 3.6 | -1.5 |
| 3RGV | 3.4 | -1.2 |
| 4PRH | 3.4 | 3    |
| 3MV7 | 3.1 | 2.4  |
| 3MV8 | 3.1 | 2.6  |

|      |     |      |
|------|-----|------|
| 3MV9 | 3.1 | 2.7  |
| 4PRP | 3   | 2.6  |
| 3VXM | 2.7 | -3.4 |
| 5NHT | 2.7 | 1.1  |
| 5NQK | 2.4 | 0.9  |
| 5NMG | 2.2 | 3.2  |
| 3VXS | 2.1 | -0.6 |
| 5C0B | 2.1 | -1.9 |
| 3QEQ | 2   | -0.8 |
| 6AVG | 2   | 1.2  |
| 3O4L | 1.7 | -1.2 |
| 5C0C | 1.7 | -1.7 |
| 5NME | 1.7 | 3.1  |
| 6D78 | 1.7 | -0.2 |
| 4L3E | 1.6 | -0.4 |
| 3VXR | 1.5 | -0.6 |
| 5C08 | 1.4 | -2.8 |
| 5C0A | 1.4 | -0.8 |
| 3QDG | 1.3 | -1   |
| 5C09 | 1.3 | -1.5 |
| 5WKF | 1.3 | -1.3 |
| 6DKP | 1.3 | -0.2 |
| 2AK4 | 1.2 | 6.6  |
| 3QDJ | 1.2 | -0.9 |
| 5C07 | 1.2 | -1.7 |
| 5NMF | 1.2 | 3.2  |
| 5WKH | 1.2 | -1.6 |
| 3VXU | 1.1 | 3.3  |
| 5HYJ | 1   | -2.3 |
| 6AM5 | 0.9 | -0.8 |
| 4JRX | 0.8 | 8.5  |
| 1KJ2 | 0.7 | 2.5  |
| 2GJ6 | 0.6 | 1.8  |
| 3UTS | 0.4 | -0.2 |
| 6EQA | 0.2 | -1.5 |
| 4JFD | 0.1 | -2.5 |
| 5BRZ | 0.1 | 6.4  |
| 5BS0 | 0.1 | 6.8  |
| 3QFJ | 0   | 1.7  |
| 6EQB | 0   | -2.2 |

|      |       |      |
|------|-------|------|
| 3PWP | -0.1  | 1.6  |
| 4JFE | -0.1  | -2.4 |
| 4JFF | -0.1  | -2.4 |
| 4QOK | -0.1  | -1.8 |
| 6AMU | -0.1  | 0.2  |
| 1QRN | -0.2  | 2    |
| 3H9S | -0.2  | 2    |
| 3HG1 | -0.2  | -1.9 |
| 4FTV | -0.3  | 1.6  |
| 1AO7 | -0.4  | 2    |
| 1QSE | -0.5  | 1.4  |
| 2NX5 | -0.7  | 2.4  |
| 1QSF | -0.8  | 1.5  |
| 4QRP | -0.9  | -1.3 |
| 1BD2 | -1.3  | -0.3 |
| 6AVF | -1.7  | -0.1 |
| 3FFC | -2.3  | 2.9  |
| 4JRY | -14.6 | 0.8  |

<sup>1</sup>PDB code for complex structure, with new structures described in this work given by TCR name (12-6, 38-10, 1a2) and corresponding rows highlighted.

<sup>2</sup>TCR-pMHC complexes were oriented into a common reference frame centered at average C $\alpha$  atom position of MHC helices, and rotated such that the  $x$ - $y$  plane is parallel with the helix plane, and the  $x$ -axis is parallel to peptide groove, with greater  $x$  value corresponding to peptide C-terminus. TCR variable domain centers were calculated by taking centers of individual variable domains by average positions of S $\gamma$  atoms of conserved Cys residues (or C $\alpha$  atoms at corresponding positions where Cys residues are not present in the TCR), and then calculating the mean position of TCR V $\alpha$  and V $\beta$  centers.  $X$  position ( $x$  pos) and  $y$  position ( $y$  pos) values represent projections into the  $x$ - $y$  plane, and thus the MHC helix plane, of these centers.



**Supplementary Table 5. Interactions between TCRs and HLA-A2**

| HLA-A2     | TCR 12-6                                                                                                                                                                                |                                                                                 | TCR 38-10                                                                                                                                           |                                                            | TCR 1a2                                                                                                                                     |                                                            |
|------------|-----------------------------------------------------------------------------------------------------------------------------------------------------------------------------------------|---------------------------------------------------------------------------------|-----------------------------------------------------------------------------------------------------------------------------------------------------|------------------------------------------------------------|---------------------------------------------------------------------------------------------------------------------------------------------|------------------------------------------------------------|
|            | Hydrogen bonds                                                                                                                                                                          | Van der Waals contacts                                                          | Hydrogen bonds                                                                                                                                      | Van der Waals contacts                                     | Hydrogen bonds                                                                                                                              | Van der Waals contacts                                     |
| $\alpha 1$ |                                                                                                                                                                                         |                                                                                 |                                                                                                                                                     |                                                            |                                                                                                                                             |                                                            |
| R65H       | G94 $\alpha$ (O) R65H(N $\eta$ 2),<br>Q96 $\alpha$ (NE2) R65H(N $\epsilon$ )                                                                                                            | G94 $\alpha$ (7),<br>G93 $\alpha$ (1),<br>Y95 $\alpha$ (1),<br>Q96 $\alpha$ (9) |                                                                                                                                                     | S28 $\alpha$ (2)                                           | L94 $\alpha$ (O) R65H(N $\eta$ 2)                                                                                                           | A29 $\alpha$ (3),<br>L94 $\alpha$ (3),<br>E96 $\alpha$ (2) |
| K68H       |                                                                                                                                                                                         | Y95 $\alpha$ (2)                                                                |                                                                                                                                                     |                                                            | E96 $\alpha$ (O) K68H(O)                                                                                                                    | E96 $\alpha$ (4)                                           |
| A69H       |                                                                                                                                                                                         | Y95 $\alpha$ (5),<br>W98 $\beta$ (4)                                            |                                                                                                                                                     | S98 $\alpha$ (1)                                           |                                                                                                                                             | L94 $\alpha$ (3),<br>K95 $\alpha$ (1),<br>S98 $\alpha$ (1) |
| Q72H       |                                                                                                                                                                                         | Y95 $\alpha$ (3),<br>W98 $\beta$ (9)                                            |                                                                                                                                                     |                                                            |                                                                                                                                             | E96 $\alpha$ (1),<br>D97 $\alpha$ (5),<br>S98 $\alpha$ (2) |
| T73H       |                                                                                                                                                                                         | W98 $\beta$ (2)                                                                 |                                                                                                                                                     |                                                            |                                                                                                                                             | S98 $\alpha$ (1)                                           |
| R75H       | N30 $\beta$ (O $\delta$ 1) R75H(N $\eta$ 2),<br>S51 $\beta$ (O $\gamma$ ) R75H(N $\eta$ 1)                                                                                              | N30 $\beta$ (2),<br>S51 $\beta$ (2)                                             |                                                                                                                                                     | D56 $\beta$ (1)                                            |                                                                                                                                             |                                                            |
| V76H       |                                                                                                                                                                                         | N30 $\beta$ (1)                                                                 |                                                                                                                                                     | Y50 $\beta$ (1)                                            |                                                                                                                                             |                                                            |
| T80H       |                                                                                                                                                                                         |                                                                                 |                                                                                                                                                     | R30 $\beta$ (2)                                            |                                                                                                                                             |                                                            |
| $\alpha 2$ |                                                                                                                                                                                         |                                                                                 |                                                                                                                                                     |                                                            |                                                                                                                                             |                                                            |
| K146H      |                                                                                                                                                                                         |                                                                                 | R30 $\beta$ (N $\eta$ 2) K146H(N $\zeta$ )                                                                                                          | R30 $\beta$ (2),<br>L96 $\beta$ (2)                        |                                                                                                                                             |                                                            |
| A149H      |                                                                                                                                                                                         |                                                                                 |                                                                                                                                                     | L96 $\beta$ (1)                                            |                                                                                                                                             | D100 $\beta$ (1)                                           |
| A150H      |                                                                                                                                                                                         | Y51 $\alpha$ (5)                                                                | Y97 $\alpha$ (OH) A150H(O)                                                                                                                          | Y97 $\alpha$ (5)                                           |                                                                                                                                             |                                                            |
| H151H      |                                                                                                                                                                                         | Y51 $\alpha$ (18)                                                               | E52 $\alpha$ (O $\epsilon$ 2) H151H(N $\delta$ 1),<br>K55 $\alpha$ (N $\zeta$ ) H151H(N $\epsilon$ 2)                                               | E52 $\alpha$ (5),<br>Y54 $\alpha$ (1),<br>K55 $\alpha$ (5) |                                                                                                                                             | Y51 $\alpha$ (2)                                           |
| V152H      |                                                                                                                                                                                         |                                                                                 |                                                                                                                                                     | Y97 $\alpha$ (3)                                           |                                                                                                                                             |                                                            |
| E154H      | S52 $\alpha$ (N) E154(O $\epsilon$ 1),<br>S53 $\alpha$ (O $\gamma$ ) E154(O $\epsilon$ 1),<br>S53 $\alpha$ (O $\gamma$ ) E154(O $\epsilon$ 2),<br>S53 $\alpha$ (N) E154(O $\epsilon$ 1) | Y51 $\alpha$ (4),<br>S52 $\alpha$ (3),<br>S53 $\alpha$ (6)                      |                                                                                                                                                     | Y54 $\alpha$ (3)                                           |                                                                                                                                             | Y51 $\alpha$ (4)                                           |
| Q155H      | S32 $\alpha$ (O $\gamma$ ) Q155H(O $\epsilon$ 1),<br>Q31 $\alpha$ (N $\epsilon$ 2) Q155H(O $\epsilon$ 1)                                                                                | Q31 $\alpha$ (3),<br>Y51 $\alpha$ (1),<br>V100 $\beta$ (2)                      | N31 $\alpha$ (N $\delta$ 2) Q155H(O $\epsilon$ 1),<br>N31 $\alpha$ (N $\delta$ 2) Q155H(N $\epsilon$ 2),<br>Y97 $\alpha$ (OH) Q155H(N $\epsilon$ 2) | N31 $\alpha$ (3),<br>Y54 $\alpha$ (2),<br>Y97 $\alpha$ (3) | Q31 $\alpha$ (O $\epsilon$ 1) Q155H(N $\epsilon$ 2),<br>Y32 $\alpha$ (OH) Q155H(O $\epsilon$ 1),<br>Y32 $\alpha$ (OH) Q155H(N $\epsilon$ 2) | Y32 $\alpha$ (7),<br>Y51 $\alpha$ (6)                      |

Contact residues were identified with CONTACT (43). Hydrogen bonds were calculated using a cut-off distance of 3.5 Å. The cut-off distance for van der Waals contacts was 4.0 Å.

**Supplementary Table 6. Interactions between TCRs and p53R175H peptide**

| p53R175H | TCR 12-6                                                                                                                                                           |                                                                        | TCR 38-10                                                                                          |                                                                         | TCR Ia2                                                                                                                     |                                                                                                          |
|----------|--------------------------------------------------------------------------------------------------------------------------------------------------------------------|------------------------------------------------------------------------|----------------------------------------------------------------------------------------------------|-------------------------------------------------------------------------|-----------------------------------------------------------------------------------------------------------------------------|----------------------------------------------------------------------------------------------------------|
|          | Hydrogen bonds                                                                                                                                                     | Van der Waals contacts                                                 | Hydrogen bonds                                                                                     | Van der Waals contacts                                                  | Hydrogen bonds                                                                                                              | Van der Waals contacts                                                                                   |
| E4p      | G94 $\alpha$ (N) E4p(O $\epsilon$ 1)                                                                                                                               | V100 $\beta$ (1), G93 $\alpha$ (2)                                     | S98 $\alpha$ (O $\gamma$ ) E4p(O), N30 $\alpha$ (N) E4p(O $\epsilon$ 2)                            | E29 $\alpha$ (3), N30 $\alpha$ (8), S98 $\alpha$ (3)                    | Y100 $\alpha$ (OH) E4p(O)                                                                                                   | A29 $\alpha$ (6), Q31 $\alpha$ (1), L94 $\alpha$ (2), Y100 $\alpha$ (3)                                  |
| V5p      |                                                                                                                                                                    |                                                                        |                                                                                                    | Y97 $\alpha$ (1)                                                        |                                                                                                                             | Y100 $\alpha$ (1)                                                                                        |
| V6p      | V100 $\beta$ (N) V6p(O)                                                                                                                                            | W98 $\beta$ (1), Q99 $\beta$ (3), V100 $\beta$ (1)                     |                                                                                                    | S98 $\alpha$ (1)                                                        | Q97 $\beta$ (N $\epsilon$ 2) V6p(O)                                                                                         | L94 $\alpha$ (1), Y100 $\alpha$ (2)                                                                      |
| R7p      | Q99 $\beta$ (O $\epsilon$ 1) R7p(N $\epsilon$ ), V100 $\beta$ (O) R7p(N $\eta$ 2), G101 $\beta$ (O) R7p(N $\eta$ 2), E103 $\beta$ (O $\epsilon$ 1) R7p(N $\eta$ 1) | Q99 $\beta$ (12), V100 $\beta$ (3), G101 $\beta$ (2), E103 $\beta$ (5) | Y97 $\alpha$ (O) R7p(N $\eta$ 2), L96 $\beta$ (O) R7p(N $\eta$ 1), V97 $\beta$ (O) R7p(N $\eta$ 1) | Y97 $\alpha$ (10), Y103 $\alpha$ (12), V97 $\beta$ (1), T98 $\beta$ (1) | D100 $\beta$ (O $\delta$ 2) R7p(N $\eta$ 1), Y32 $\alpha$ (OH) R7p(N $\eta$ 1), D100 $\beta$ (O $\delta$ 2) R7p(N $\eta$ 2) | Q96 $\beta$ (2), Q97 $\beta$ (4), A99 $\beta$ (3), D100 $\beta$ (2), Y32 $\alpha$ (3), Y100 $\alpha$ (1) |
| H8p      | E95 $\beta$ (O $\epsilon$ 2) H8p(N $\delta$ 1), W98 $\beta$ (N $\epsilon$ 1) H8p(N $\epsilon$ 2), Q99 $\beta$ (O $\epsilon$ 1) H8p(N)                              | E95 $\beta$ (5), G96 $\beta$ (2), W98 $\beta$ (3), Q99 $\beta$ (10)    | Y103 $\alpha$ (OH) H8p(N), Y31 $\beta$ (OH) H8p(N $\delta$ 1)                                      | Y31 $\beta$ (5), R30 $\beta$ (3), Y50 $\beta$ (1), Y103 $\alpha$ (24)   | Q97 $\beta$ (O $\epsilon$ 1) H8p(N), Q96 $\beta$ (N $\epsilon$ 2) H8p(O), S98 $\alpha$ (O $\gamma$ ) H8p(N $\epsilon$ 2)    | M50 $\beta$ (1), Q96 $\beta$ (4), Q97 $\beta$ (15), S98 $\alpha$ (2)                                     |
| C9p      |                                                                                                                                                                    |                                                                        | R30 $\beta$ (N $\eta$ 2) C9p(O)                                                                    | R30 $\beta$ (1)                                                         |                                                                                                                             |                                                                                                          |

Contact residues were identified with CONTACT (43). Hydrogen bonds were calculated using a cut-off distance of 3.5 Å. The cut-off distance for van der Waals contacts was 4.0 Å.

**Supplementary Table 7. Calculated  $\Delta\Delta G$  of peptide point mutations based on TCR complex structures**

| <b>Peptide mutant</b> | <b>12-6<sup>1</sup></b> | <b>38-10<sup>1</sup></b> | <b>1a2<sup>1</sup></b> |
|-----------------------|-------------------------|--------------------------|------------------------|
| H1A                   | 0.0                     | 0.0                      | 0.0                    |
| M2A                   | 0.0                     | 0.0                      | 0.0                    |
| T3A                   | 0.2                     | 0.2                      | 0.2                    |
| E4A                   | 1.3                     | 1.5                      | 1.2                    |
| V5A                   | 0.7                     | 0.4                      | 0.3                    |
| V6A                   | 0.4                     | 0.2                      | 0.3                    |
| R7A                   | 2.3                     | 3.6                      | 2.2                    |
| H8A                   | 1.7                     | 2.8                      | 2.4                    |
| C9A                   | 0.0                     | 0.0                      | 0.0                    |
| H8R                   | 1.6                     | 2.0                      | 1.2                    |

<sup>1</sup>Calculated binding affinity change for interaction with pMHC for the indicated TCR based on analysis of corresponding TCR–pMHC complex structures in Rosetta, as described in Methods. Values are given in Rosetta Energy Units, which correspond approximately to energy in kcal/mol.

**Supplementary Table 8. Rosetta scoring term contributions to calculated TCR binding energy change ( $\Delta\Delta G$ ) for H8R reversion.**

| <b>Term name</b>       | <b>Description</b>                  | <b>12-6</b> | <b>38-10</b> | <b>1a2</b> |
|------------------------|-------------------------------------|-------------|--------------|------------|
| fa_atr                 | attractive van der Waals            | <b>2.1</b>  | -0.3         | -0.5       |
| fa_rep                 | repulsive van der Waals             | -0.1        | 0.8          | 0.0        |
| fa_sol                 | desolvation                         | -0.5        | 0.3          | 0.3        |
| hbond_lr_bb            | backbone hydrogen bond              | 0.0         | 0.0          | 0.0        |
| hbond_bb_sc            | backbone-side chain hydrogen bond   | 0.0         | 0.0          | 0.0        |
| hbond_sc               | side chain-side chain hydrogen bond | 0.0         | <b>1.2</b>   | <b>1.4</b> |
| Total $\Delta\Delta G$ |                                     | 1.6         | 2.0          | 1.2        |

Values are in Rosetta Energy Units (REU), and values from dominant term are shown in bold for each interface. All terms are weighted according to the “interface” scoring function in Rosetta.

**Supplementary Table 9. Sequences of codon-optimized TCR genes**

| Name           | Sequence                                                                                                                                                                                                                                                                                                                                                                                                                                                                                                                                                                                                                                                                                                                                                                                                                                                                                                                                                                       |
|----------------|--------------------------------------------------------------------------------------------------------------------------------------------------------------------------------------------------------------------------------------------------------------------------------------------------------------------------------------------------------------------------------------------------------------------------------------------------------------------------------------------------------------------------------------------------------------------------------------------------------------------------------------------------------------------------------------------------------------------------------------------------------------------------------------------------------------------------------------------------------------------------------------------------------------------------------------------------------------------------------|
| 12-6<br>alpha  | <p>ATGCGTAAAGAAGTTGAGCAGGATCCGGGTCCGTTCAACGTGCCGGAGGGTGCGACCGTT<br/>           GCGTTCAACTGCACCTACAGCAACAGCGCGAGCCAGAGCTTCTTTTGGTACCGTCAAGAT<br/>           TGCCGTAAGGAGCCGAAACTGTTGATGAGCGTTTACTCCAGCGGTAACGAAGACGGCCGT<br/>           TTCACCGCGCAGCTGAACCGTGCGAGCCAATACATCAGCTTGCTGATTTCGCGACAGCAAA<br/>           CTGAGCGATAGCGCGACCTACCTGTGCGTGGTTCAGCCGGGTGGCTACCAAAAAGGTGACC<br/>           TTCGGTACCGGTACCAAAGTGCAGGTTATCCCGAACATTTCAGAACCCGGACCCGGCGGTG<br/>           TACCAACTGCGTGACAGCAAGAGCTCCGATAAAAAGCGTGTGCCTGTTTACCGACTTCGAT<br/>           AGCCAGACCAACGTTAGCCAAAGCAAGGACAGCGATGTGTACATCACCGACAAATGCGTT<br/>           CTGGATATGCGTAGCATGGACTTCAAGAGCAATAGCGCTGTGGCGTGGAGCAACAAGAGC<br/>           GATTCGCGTGCGCGAACGCGTTCAACAATAGCATCATTCCGGAGGACACCTTCTTTCCG<br/>           AGCCCGGAAAGCTCCTAA</p>                                                                                                                                                           |
| 12-6<br>beta   | <p>ATGAACGCGGGCGTGACCCAGACCCCGAAGTTCCAAGTTCGAAAACCGGTCAGAGCATG<br/>           ACCCTGCAGTGCGCGCAAGACATGAACCACAACAGCATGTACTGGTATCGTCAAGATCCG<br/>           GGTATGGGCCTGCGCCTGATCTACTATAGCGCGAGCGAGGGTACCACTGACAAGGGCGAA<br/>           GTGCCGAACGGTTACAACGTTAGCCGTCTGAACAAGCGTGAGTTCAGCCTGCGTCTGGAA<br/>           AGCGCGGCTCCGAGCCAGACCAGCGTGTACTTCTGCGCGAGCTCCGAGGGCCTGTGGCAG<br/>           GTTGGTGACGAACAATACTTCGGTCCGGGTACCCGTCTGACCGTGACCGAGGATCTGAAG<br/>           AACGTTTTTCCCACCGGAAGTGGCGGTTTTTCGAACCGAGCGAGGCGGAAATTAGCCACACC<br/>           CAGAAAGCGACCCCTGGTGTGCCTGGCGACCGGCTTCTATCCGGACCACGTGGAGCTGTCC<br/>           TGGTGGGTTAACGGCAAGGAAGTGCACAGCGGTGTTTGCACCGACCCGCAGCCGCTGAAA<br/>           GAGCAACCGGCGCTGAACGATAGCCGTTATGCGCTGAGCTCCCGTCTGCGTGTGAGCGCG<br/>           ACCTTCTGGCAGAACCCGCGTAACCACTTCCGTTGCCAGGTTCAATTCTATGGCCTGAGC<br/>           GAGAACGACGAATGGACCCAGGATCGTGCGAAGCCGGTGACCCAAATCGTTAGCGCGGAA<br/>           GCGTGGGGTCGTGCGGATTAA</p> |
| 38-10<br>alpha | <p>ATGGCGCAGACCGTTACCCAAAGCCAACCGGAGATGAGCGTGCAAGAGGCGGAAACCGTT<br/>           ACCCTGAGCTGCACCTACGATACCAGCGAAAACAATTATTACCTGTTCTGGTACAAGCAG<br/>           CCACCGAGCCGTCAAATGATCCTGGTGATTTCGTCAGGAAGCGTACAAACAGCAAAACGCG<br/>           ACCGAAAACCGTTTCAGCGTGAACCTCCAGAAGGCCGCGAAGAGCTTCAGCCTGAAGATC<br/>           AGCGACAGCCAACCTGGGTGATACCAGCGATGTATTTCTGCGCGTTCATGGGCTACAGCGGT<br/>           GCGGGCAGCTATCAGCTGACCTTTGGCAAGGGCACCAAAGTGCAGCGTGATCCCGAACATT<br/>           CAGAACCCGGACCCGGCGGTTTTACCAACTGCGTGACAGCAAGAGCTCCGATAAAAAGCGTG<br/>           TGCTGTTTACCGACTTCGATAGCCAGACCAACGTTAGCCAAAGCAAGGACAGCGATGTG<br/>           TACATCACCGACAAGTGCCTTCTGGATATGCGTAGCATGGACTTCAAGAGCAACAGCGCG<br/>           GTTGCCTGGAGCAATAAAAAGCGATTTTCGCGTGCGCGAACGCGTTCAACAATAGCATCATT<br/>           CCGGAGGACACCTTCTTTCCGAGCCCGGAAAGCTCCTAA</p>                                                                                                                                  |

38-10  
beta

ATGGATGCCGGTATTACCCAAAGCCCGCGTCACAAGGTGACCGAAACCGGTACCCCGGTT  
ACCTTGCCTTGCCACCAGACCGAAAACCACCGTTACATGTACTGGTACCGTCAAGATCCG  
GGTACCGCCTGCGTCTGATTCACTATAGCTACGGTGTGAAGGACACCGACAAAGGTGAG  
GTGAGCGACGGCTATAGCGTTAGCCGTAGCAAAACCGAGGATTTCTGTGACCCTGGAA  
AGCGCGACCAGCTCCCAGACCAGCGTGTACTTCTGCGCGATCAGCGAGCTGGTTACCGGT  
GACAGCCCGCTGCACTTTGGTAACGGCACCCGTCTGACCGTGACCGAAGATCTGAAGAAC  
GTTTTCCACCGGAAGTGGCGGTTTTTCGAACCGAGCGAGGCGGAAATTAGCCACACCCAG  
AAAGCGACCCTGGTTTTGCCTGGCGACCGGTTTTCTATCCGGACCACGTGGAGCTGTCCTGG  
TGGGTTAACGGCAAGGAAGTGCATAGCGGCGTTTTGCACCGACCCGCAGCCGCTGAAAGAG  
CAACCGGCGCTGAACGATAGCCGTTATGCGCTGAGCTCCCGTCTGCGTGTGAGCGCGACC  
TTCTGGCAAAACCCGCGTAACCACTTCCGTTGCCAGGTTCAATTCTACGGTCTGAGCGAG  
AACGACGAATGGACCCAGGATCGTGCGAAGCCGGTGACCCAAATTGTTAGCGCGGAAGCG  
TGGGTCGTGCCGACTAA

1a2  
alpha

ATGCAGAAAGAAGTGGAAACAGGATCCGGGTCCGCTGAGCGTGCCGGAAGGTGCGATTGTG  
AGCCTGAAGTGCACCTACAGCAACAGCGCGTTTTCAAGTATTTTCATGTGGTATCGTCAGTAT  
AGCCGTAAAGGTCCGGAAGTGCCTCATGTATACCTATAGCAGCGGCAACAAGGAAGATGGC  
CGTTTCACCGCTCAAGTGGATAAGAGCAGCAAAATACATTAGCCTGTTTCATTCGTGACAGC  
CAGCCGAGCGATAGCGCGACCTATCTGTGCGCGATGAGCGGCCTGAAGGAGGACAGCAGC  
TATAAACTGATCTTTGGCAGCGGTACCCGCTCTGCTGGTTTCGTCCGGATATTTCAAACCCG  
GACCCGGCGGTGTACCAACTGCGTGATAGCAAGAGCAGCGATAAAAGCGTGTGCCTGTTTC  
ACCGACTTCGATAGCCAGACCAACGTTAGCCAAAGCAAGGACAGCGATGTGTATATCACC  
GACAAATGCGTTCTGGATATGCGTAGCATGGACTTCAAGAGCAATAGCGCGGTTGCGTGG  
AGCAACAAAAGCGATTTTCGCGTGCGCGAACGCGTTTTAACAACAGCATCATTCCGGAGGAC  
ACCTTCTTTCCGAGCCCGGAAAGCAGCTAA

1a2 beta

ATGGAAGCGCAGGTGACCCAGAACCCGCGCTATCTGATTACCGTGACCGGCAAAAAACTG  
ACCGTGACCTGCAGCCAGAACATGAACCATGAATATATGAGCTGGTATCGCCAGGATCCG  
GGCTGGGCCTGCGCCAGATTTATATAGCATGAACGTGGAAGTGACCGATAAAGGCGAT  
GTGCCGGAAGGCTATAAAGTGAGCCGCAAAAGAAAAACGCAACTTCCGCTGATTTCTGGAA  
AGCCCGAGCCCGAACCAGACCAGCCTGTATTTTTGCGCGAGCAGCATTACAGCAGGGCGCG  
GATACCCAGTATTTTGGCCCCGGGCACCCGCTGACCGTGCTGGAAGATCTGAAGAACGTT  
TTCCCACCGGAAGTGGCGGTTTTTCGAACCGAGCGAGGCGGAAATTAGCCACACCCAGAAA  
GCGACCCTGGTTTTGCCTGGCGACCGGTTTTCTATCCGGACCACGTGGAGCTGTCCTGGTGG  
GTTAACGGCAAGGAAGTGCATAGCGGCGTTTTGCACCGACCCGCAGCCGCTGAAAGAGCAA  
CCGGCGCTGAACGATAGCCGTTATGCGCTGAGCTCCCGTCTGCGTGTGAGCGCGACCTTC  
TGGCAAAACCCGCGTAACCACTTCCGTTGCCAGGTTCAATTCTACGGTCTGAGCGAGAAC  
GACGAATGGACCCAGGATCGTGCGAAGCCGGTGACCCAAATTGTTAGCGCGGAAGCGTGG  
GGTCGTGCCGACTAA

# Supplementary Fig. 1

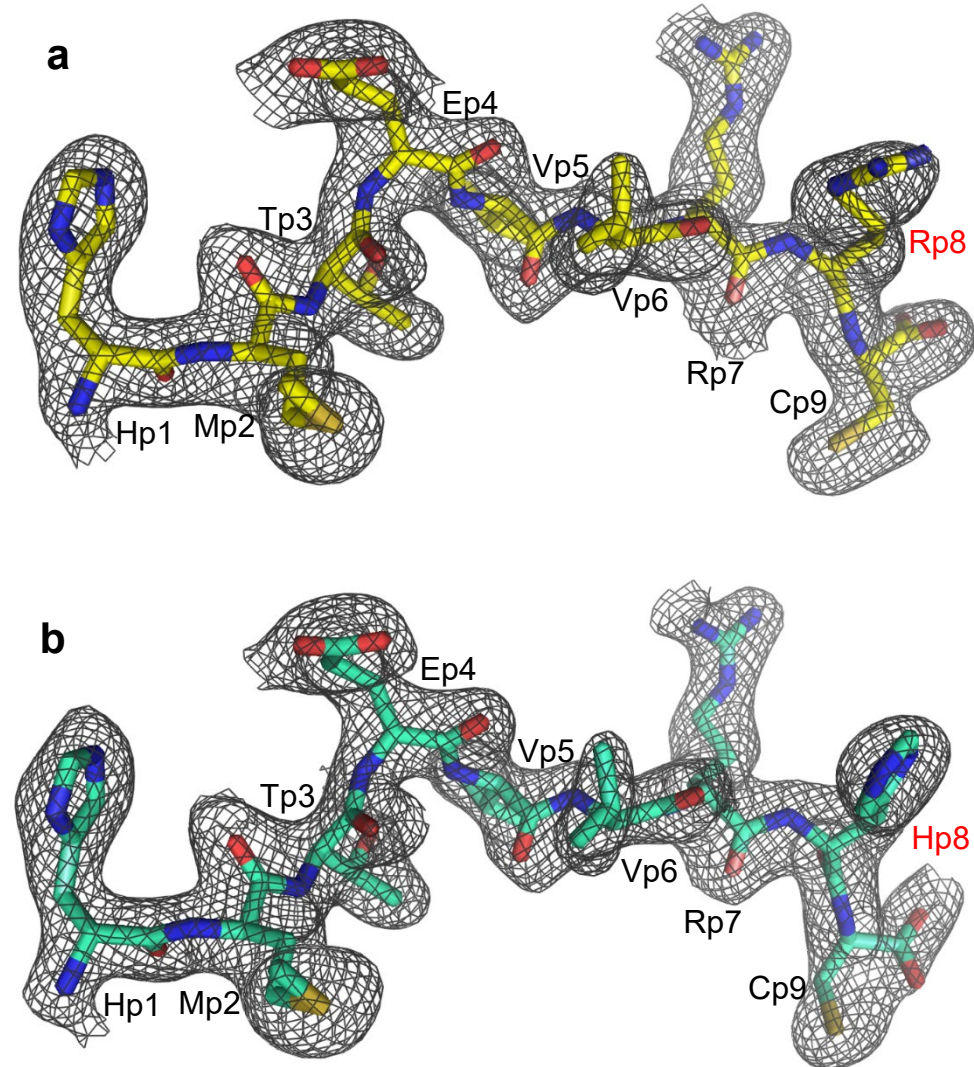

**Supplementary Figure 1.** (a) Electron density for the bound wild-type p53 peptide in the p53–HLA-A2 complex. The  $F_o - F_c$  omit map at 2.37 Å resolution is contoured at  $1\sigma$ . (b) Electron density for the bound mutant p53R175H peptide in the p53R175H–HLA-A2 complex. The  $F_o - F_c$  omit map at 2.38 Å resolution is contoured at  $1\sigma$ .

## Supplementary Fig. 2

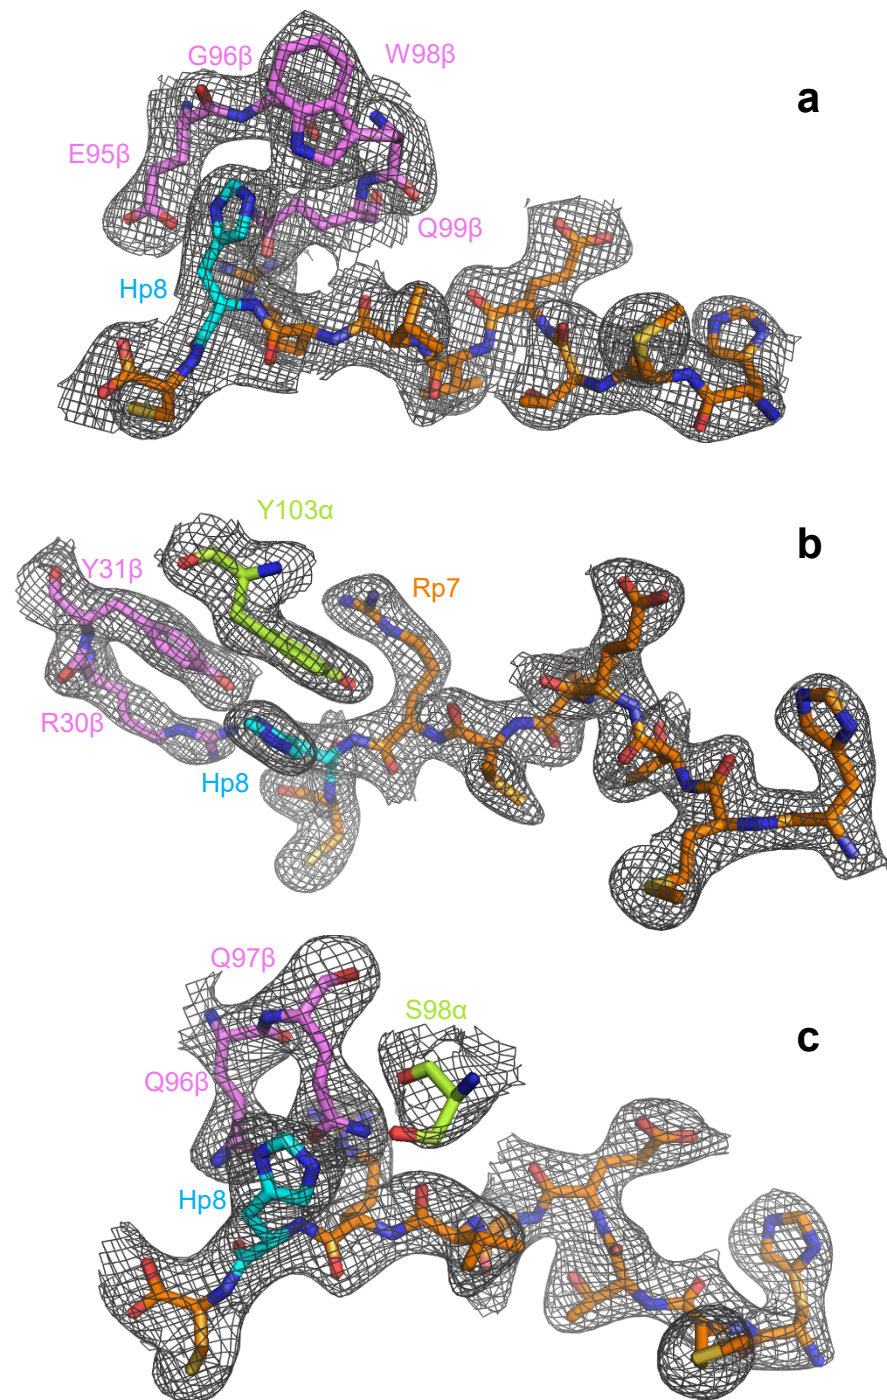

**Supplementary Figure 2. (a)** Electron density at the interface in the 12-6-p53R175H-HLA-A2 complex. Density from the final  $2F_o - F_c$  map at 2.61 Å resolution is contoured at  $1\sigma$ .

**(b)** Electron density at the interface in the 38-10-p53R175H-HLA-A2 complex. Density from the final  $2F_o - F_c$  map at 2.46 Å resolution is contoured at  $1\sigma$ .

**(c)** Electron density at the interface in the 1a2-p53R175H-HLA-A2 complex. Density from the final  $2F_o - F_c$  map at 3.00 Å resolution is contoured at  $1\sigma$ .



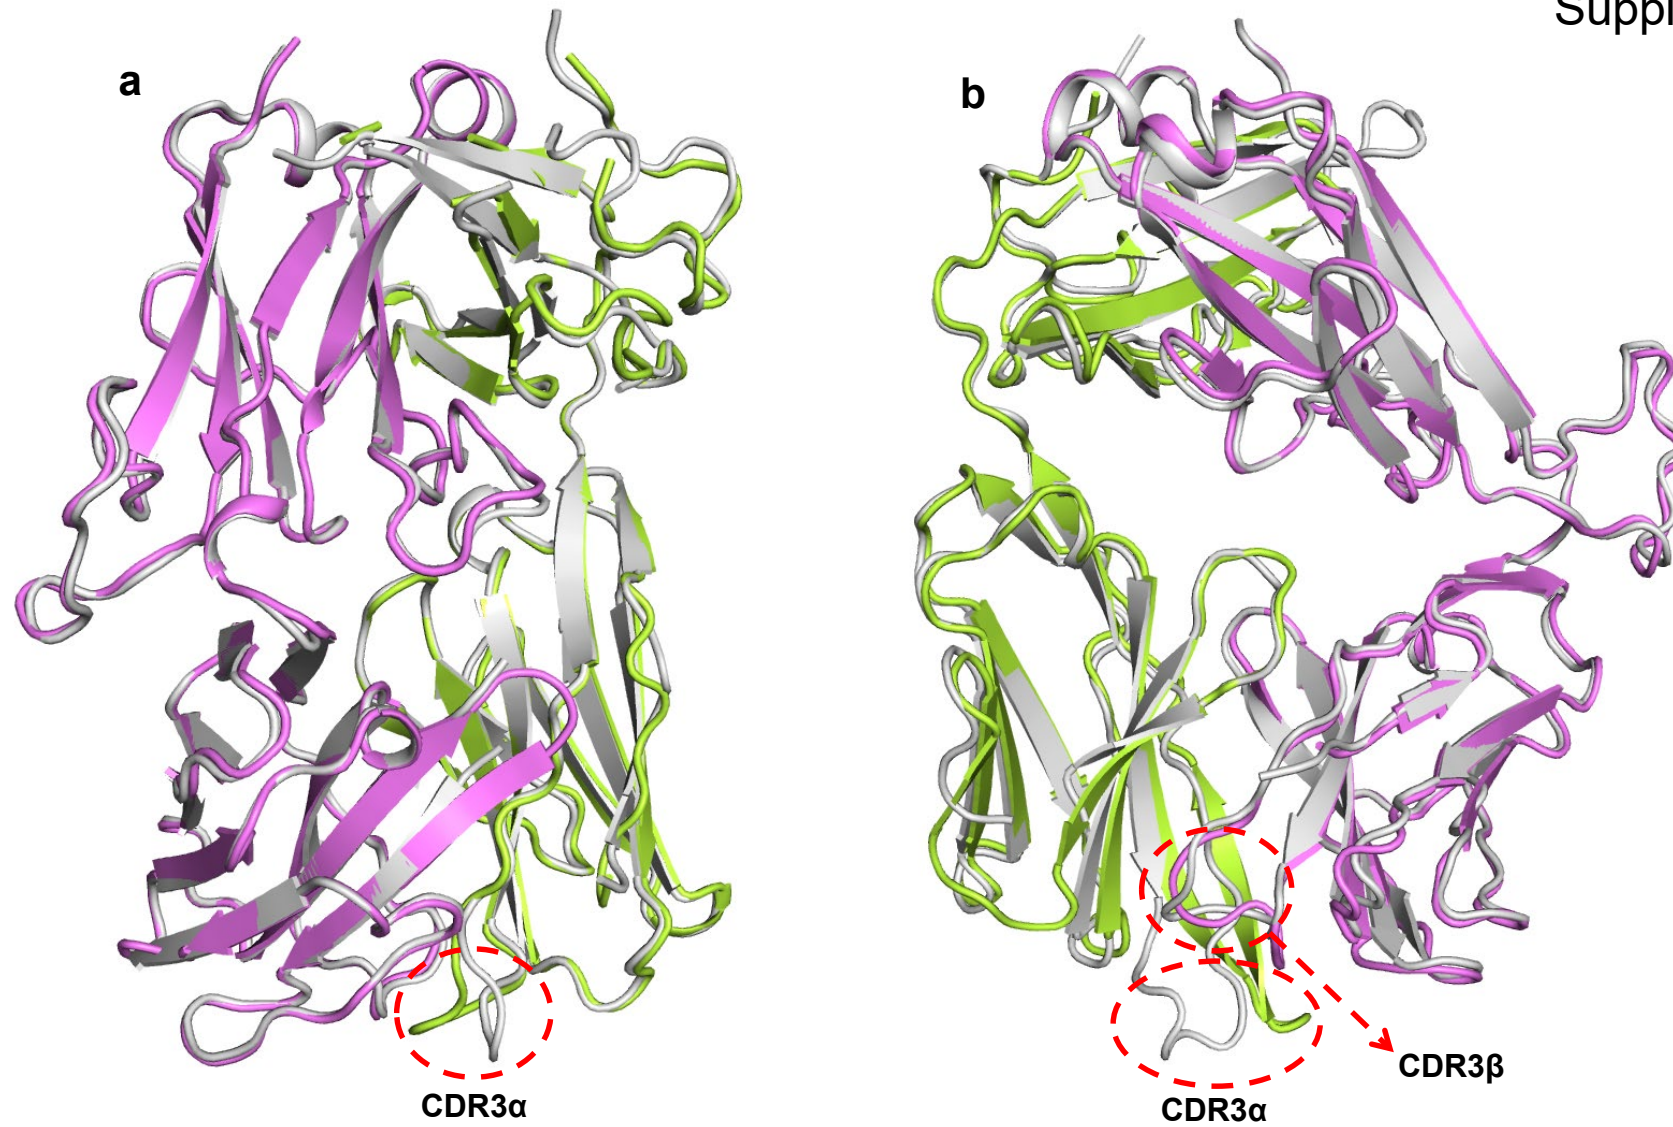

**Supplementary Figure 3.** (a) Superposition of free TCR 12-6 (gray) onto bound TCR 12-6 ( $\alpha$  chain, green;  $\beta$  chain, violet). (b) Superposition of free TCR 1a2 onto bound TCR 1a2. CDR loops undergoing the largest conformation changes upon binding p53R175H–HLA-A2 are circled.
